# Supplementary material
Source: PubMed Central journal article supplement (PMC9780174)
Supplement: NIHMS1841005-supplement-Supplemental_File.pdf [file NIHMS1841005-supplement-Supplemental_File.pdf]

## **SUPPLEMENTAL MATERIAL**

### **Optimal Cerebral Perfusion Pressure and Brain Tissue Oxygen in Aneurysmal Subarachnoid Hemorrhage: a correlation study**

Short title: Correlation of CPPopt and Brain Tissue Oxygen

Megjhani, Murad PhD<sup>1\*</sup>  
Weiss, Miriam MD<sup>2\*</sup>  
Ford, Jenna MD<sup>3</sup>  
Terilli, Kalijah<sup>1</sup>  
Kastenholz, Nick<sup>2</sup>  
Nametz, Daniel<sup>1</sup>  
Kwon, Soon Bin PhD<sup>1</sup>  
Velazquez, Angela MD<sup>3</sup>  
Agarwal, Sachin MD MPH<sup>3,4</sup>  
Roh, David J. MD<sup>3,4</sup>  
Conzen-Dilger, Catharina MD<sup>2</sup>  
Albanna, Walid MD<sup>2</sup>  
Veldeman, Michael MD<sup>2</sup>  
Connolly Jr., E. Sander MD<sup>4,5</sup>  
Claassen, Jan MD<sup>3,4</sup>  
Aries, Marcel MD PhD<sup>6,7</sup>  
Schubert, Gerrit Alexander MD<sup>2,8</sup>  
Park, Soojin MD<sup>1,3,4,9</sup>

\* Co-First Author, equal contributions

<sup>1</sup> Department of Neurology, Columbia University, New York, USA

<sup>2</sup> Department of Neurosurgery, RWTH Aachen University, Aachen, Germany

<sup>3</sup> Program in Hospital and Intensive Care Informatics, Department of Neurology, Columbia University, New York, USA

<sup>4</sup> New York-Presbyterian Hospital, Columbia University Irving Medical Center, New York, USA

<sup>5</sup> Department of Neurosurgery, Columbia University, New York, USA

<sup>6</sup> Department of Intensive Care, Maastricht University Medical Center, Maastricht University, Maastricht, The Netherlands

<sup>7</sup> School for Mental Health and Neuroscience (MHeNS), Maastricht University Medical Center, Maastricht, The Netherlands

<sup>8</sup> Department of Neurosurgery, Kantonsspital Aarau, Aarau, Switzerland

<sup>9</sup> Department of Biomedical Informatics, Columbia University, New York, USA

#### **Corresponding author:**

Soojin Park

177 Fort Washington Ave., New York, NY 10013

Sp3291@cumc.columbia.edu

**Table S1: Results of non-linear regression using natural spline**

|           | All                 |                  | DCI-                |                  | DCI+                |                  |
|-----------|---------------------|------------------|---------------------|------------------|---------------------|------------------|
|           | Coeff [0.025-0.975] | P value          | Coeff [0.025-0.975] | P value          | Coeff [0.025-0.975] | P value          |
| Intercept | 18.88[16.86-20.9]   | <b>&lt;0.001</b> | 19.23[16.83-21.63]  | <b>&lt;0.001</b> | 18.09[14.71-21.46]  | <b>&lt;0.001</b> |
| Degree 0  | -4.47[-9.76-0.83]   | 0.098            | -2.61[-8.96-3.73]   | 0.419            | -5.83[-13.2-1.55]   | 0.122            |
| Degree 1  | 6.43[4.31-8.55]     | <b>&lt;0.001</b> | 3.88[1.35-6.41]     | <b>0.003</b>     | 9.35[5.89-12.81]    | <b>&lt;0.001</b> |
| Degree 2  | 7.04[4.83-9.25]     | <b>&lt;0.001</b> | 4.97[2.32-7.61]     | <b>&lt;0.001</b> | 9.75[6.09-13.41]    | <b>&lt;0.001</b> |
| Degree 3  | 9.88[1.64-18.12]    | <b>0.019</b>     | 13[3.27-22.73]      | <b>0.009</b>     | 4.81[-9.26-18.88]   | 0.503            |
